# Supplementary material for: Medical therapy versus radiofrequency endometrial ablation in the initial treatment of heavy menstrual bleeding (iTOM Trial): A clinical and economic analysis
Source: PubMed Central journal article supplement (PMC5687740; doi:10.1371/journal.pone.0188176), 2017-11-15
Supplement: pone.0188176.s003.pdf [file pone.0188176.s003.pdf]

### Special Instructions For Authors Of Health Economics Manuscripts\*

In addition to the general instructions for authors and other guidelines applicable to their study (for example, CONSORT guidelines for a randomized, controlled trial), authors of health economics manuscripts should consider the following issues specific to such studies and address them in the manuscript and/or submission letter. This checklist should be included with the general manuscript checklist.

| Not applicable or issue addressed in:                |                   |                                                                                                                                                  |
|------------------------------------------------------|-------------------|--------------------------------------------------------------------------------------------------------------------------------------------------|
| Manuscript Page Number                               | Submission Letter | Issue to be addressed                                                                                                                            |
| <b>Title</b>                                         |                   |                                                                                                                                                  |
|                                                      | ✓                 | Includes the type of economic evaluation and any comparisons if applicable                                                                       |
| <b>Introduction</b>                                  |                   |                                                                                                                                                  |
| 5                                                    |                   | Includes the type of economic evaluation and the comparative interventions in the aim of the study                                               |
| <b>Materials and Methods</b>                         |                   |                                                                                                                                                  |
| 8                                                    |                   | Includes the perspective (point of view) and time frame of the economic evaluation                                                               |
| 8                                                    |                   | Adequately describe alternative strategies or interventions                                                                                      |
| Not Relevant                                         |                   | Include a "do nothing" strategy or a rational for its exclusion                                                                                  |
| 9                                                    |                   | Primary outcome analysis is well defined and established <i>a priori</i> or the rational for a <i>post hoc</i> analysis is defined               |
| Not Relevant                                         |                   | Include and justify the details and parameters of the model or decision analysis tree                                                            |
| 8                                                    |                   | Include consideration of long-term costs and benefits                                                                                            |
| Not Relevant                                         |                   | Document the reliability of information sources                                                                                                  |
| Not Relevant                                         |                   | Sensitivity analyses have reasonable ranges and are based on evidence                                                                            |
| 8                                                    |                   | Describe methods for estimating quantities and unit costs                                                                                        |
| Not Relevant                                         |                   | Include currency conversion and discount rates or rational for excluding these                                                                   |
| Not Relevant                                         |                   | Adjust for timing both of costs and of benefits or include a rational for excluding this                                                         |
| <b>Results</b>                                       |                   |                                                                                                                                                  |
| 25 (Table 5)                                         |                   | Present data both in aggregated and disaggregated forms                                                                                          |
| Not Relevant                                         |                   | Cost-benefit analyses specify the type of evaluation (that is benefits-to-cost ratio, net present value, or net benefits as percentage of costs) |
| Not Relevant                                         |                   | Express results of any break-even equation in monetary terms                                                                                     |
| 8                                                    |                   | Specify if human capital or willingness to pay approach is used in cost-benefit analyses                                                         |
| Not Relevant                                         |                   | Express cost-effectiveness analyses data as cost per unit of effectiveness (cost-effectiveness ratio)                                            |
| Not Relevant                                         |                   | Express treatment cost-effectiveness comparisons as incremental cost-effectiveness ratios                                                        |
| Not Relevant                                         |                   | Express cost-utility analysis results as cost per quality-adjusted life-year                                                                     |
| <b>Definitions for types of economic evaluations</b> |                   |                                                                                                                                                  |
| Cost-benefit analysis                                |                   | Compares monetary cost and benefits of alternative strategies                                                                                    |
| Cost-effective analysis                              |                   | Compares the cost of alternative strategies that have different clinical outcomes                                                                |
| Cost-minimization analysis                           |                   | Compares the costs of alternative strategies that have clinically equivalent outcomes                                                            |
| Cost-utility analysis                                |                   | Compares the costs of alternative strategies using quality of life outcome measures                                                              |

\*Adapted from Vintzileos and Beazoglou. Am J Obstet Gynecol 2004;191:1070-6.
